# Supplementary material for: Genotype–phenotype correlations and novel molecular insights into the DHX30-associated neurodevelopmental disorders
Source: Genome Med. 2021 May 21;13:90. doi: 10.1186/s13073-021-00900-3 (PMC8140440; doi:10.1186/s13073-021-00900-3)
Supplement: Supplementary file 2 — Additional file 2: Table S1. Summary on clinical features of individuals bearing pathogenic DHX30 variants. [file 13073_2021_900_MOESM2_ESM.xlsx]

## Sheet: Table S1
Additional file 2: Table S1: Summary on clinical features of individuals bearing pathogenic DHX30 variants.
Clinical findings	Individual 1	Individual 2	Individual 3	Individual 4	Individual 5	Individual 6	Individual 7	Individual 8	Individual 9	Individual 10	Individual 11	Individual 12	Individual 13	Individual 14	Individual 15	Individual 16	Individual 17	Individual 18	Individual 19	Individual 20	Individual 21	Individual 22	Individual 23	Individual 24	Individual 25
Sex	Female	Male	Female	Male	Female	Female	Male	Female, half-sister of #9	Female, half-sister of #8	Female	Female	Female	Male	Male	Male	Female	Female	Male	Female	Male	Female	Female	Male	Male	Male
Age at last examination (years)	6 6/12	4 years 2 months	23	10 months, deceased at 11 months	11	15	33	14	6	33 months	7	8	8	4	2 years 7 months	4	7 years 6 months	3	2y5m	16 y 10mo	11 years and 4 months	5 years, 10 months	3	3	2
Intellectual disability	+	+	+	too young to evaluate	+	moderate	+	+	+	+	+	+	+	+	+	+	+	+	+	+	-	+	+	+	+
Age of first words (years)	-	-	-	too young to evaluate	NA	2 y	No words	5 y	-	30 months	-	-	4	-	-	-	-	-	-	-	1 year	~1 year	1.5 years	1	17 months
Speech ability	non-verbal	non-verbal	non-verbal	too young to evaluate	4 words	simple sentence	non-verbal	single words	non-verbal	two words	non-verbal	non-verbal	single words	non-verbal	non-verbal	non-verbal	non-verbal	non-verbal	non-verbal	non-verbal	normal speech ability, slurred speech	normal speech ability, slurred speech	20 words	100 words	25-30 words
Motor development delay	+	+	+	+	+	+	+	+	+	+	+	+	+	+	+	+	+	+	+	+	-	mild	mild	mild	mild
Muscular hypotonia	+	+	+	+	+	+	+	+	+	+	+	+	+	+	+	+	+	+	+	-	-	-	+	+	+
Age of walking (years)	-	2y 6 m	4y 6m	too young to evaluate	-	2 y 8 m	12	10	-	-	-	4	-	-	-	-	3	-	1y10m	20-21 months	1 year	1	16 months	1	18 months
Gait abnormalities	no independent walking	ataxic	ataxic	too young to evaluate	no independent walking	ataxic	ataxic	unsteady	no independent walking	no independent walking	no independent walking	ataxic	no independent walking	no independent walking	no independent walking	no independent walking	ataxic	no independent walking	unsteady (now using braces)	ataxic	ataxic gait, starting at the age of 8-9 years	unsteady	N/A	unsteady	ataxic
Autistic features	-	-	Uncertain. Poor eye contact	too young to evaluate	+	+as toddler	+; interactive	-	-	+	N/A	+	-	-	N/A; always cheerful	Inconsistent eye contact	-	-	-	+	-	-	N/A	-	-
Sleep disturbance	+	+	+	+	-	+	+	-	-	+	-	+	-	-	-	-	+	-	+	+	-	+	N/A	-	+
Seizures	-	-	No seizures ever noted, normal EEG; vacant episodes have been reported.	+	-	+	-; single febrile seizure	+	No seizures ever noted, normal EEG; vacant episodes have been reported.	-	+	-	-	-	-	+	-	-	-	-	-	Non-epileptic abscenses	N/A	-	+
Feeding difficulties	+	+	+	+	+	+	+	-	+	+	+	+	+	+	+	-	+	+	-	+	-	-	intermittent picky eating	-	-
Strabismus	+	-	-	-	+	-	+; L esotropia	-	-	Rotatory nystagmus	When fatigued	+	-	-	+	-	-	+	-	-	+	Bilat intermittent exotropia	Left eye exotropia	-	-
Joint hypermobility	+	-	+	-	+	+	+	-	-	+	+	+	+	+	-	+	+	+	+	+	-	-	N/A	-	+
Microcephaly	+	+	NA	-	+	+	+	+	+	NA	+	-	+	+	+	NA	-	+	-	+	-	-	-	-	-
Cerebral MRI anomalies	Mostly frontal cerebral atrophy	-	Abnormal white matter change around the posterior horns of both lateral ventricles.	central inflammatory brain lesions	cortical and subcortical atrophy and delayed myelination	-	mild diffuse prominence of the cerebrospinal fluid space and mild asymmetric prominence of right superior ophthalmic vein	ND	partial agenesis of the corpus callosum	delayed myelination, delayed corpus callosum development, and L hippocampal atrophy	delayed myelination	periventricular leukomalacia	-	-	ND	abnormal brain with diffuse abnormal subcortical and periventricular white matter signal abnormality in a symmetric pattern involving the temporal frontal and parietal lobes with associated abnormal cerebral volume loss	decreased in white matter volume	+ (under opercularization of the sylvian fissures)	-	-	Cerebellar atrophy, progressive	-	ND	T2 hyperintensities consistent with hypomyelination, Chiari type I malformation	ventriculomegaly with mild reduction of white matter
	c.1385G>A	c.1478G>A	c.1685A>G	c.2174G>A	c.2201C>A	c.2201C>A	c.2215A>G	c.2344C>T	c.2344C>T	c.2344C>T	c.2344C>T	c.2344C>T	c.2345G>A	c.2345G>A	c.2345G>A	c.2353 C>T	c.2353 C>T	c.2353 C>T	c.2353 C>T	c.2354G>A	c.2723G>A	c.347_360del	c.2389C>T	arr[GRCh37] chr3:(47098509_48109065)del	[GRCh37] chr3:(47882366-47884746)del
DHX30 alteration (NM_138615.2)	p.(Gly462Glu)	p.(Arg493His)	p.(His562Arg)	p.(Arg725His)	p.(Ala734Asp)	p.(Ala734Asp)	p.(Thr739Ala)	p.(Arg782Trp)	p.(Arg782Trp)	p.(Arg782Trp)	p.(Arg782Trp)	p.(Arg782Trp)	p.(Arg782Gln)	p.(Arg782Gln)	p.(Arg782Gln)	p.(Arg785Cys)	p.(Arg785Cys)	p.(Arg785Cys)	p.(Arg785Cys)	p.(Arg785His)	p.(Arg908Gln)	p.(Ala116Valfs*12)	p.(Arg797*)	whole gene deletion	Exon 7-9 deletion
Mode of inheritance	de novo	unknown (heterozygous)	unknown (heterozygous)	homozygous	de novo	de novo mosaic	unknown (heterozygous not maternaly inherited)	unknown (heterozygous, possibly inherited from mosaic mother)	unknown (heterozygous, possibly inherited from mosaic mother)	de novo	de novo	de novo	de novo	de novo	de novo	unknown (heterozygous)	de novo	de novo	de novo	de novo	de novo	de novo	heterozygous, inherited from mosaic mother	assumed de novo	assumed de novo
gnomAD v2.1.1	not identified	not identified	not identified	not identified	not identified	not identified	not identified	not identified	not identified	not identified	not identified	not identified	not identified	not identified	not identified	not identified	not identified	not identified	not identified	not identified	not identified	not identified	not identified	not identified	not identified
ACMG classification	pathogenic	pathogenic	pathogenic	uncertain significance	pathogenic	pathogenic	likely pathogenic	pathogenic	pathogenic	pathogenic	pathogenic	pathogenic	pathogenic	pathogenic	pathogenic	pathogenic	pathogenic	pathogenic	pathogenic	pathogenic	likely pathogenic	likely pathogenic	likely pathogenic	likely pathogenic	likely pathogenic
ACMG criteria	PS2, PM1, PM2, PP2, PP3	PS1, PS3, PM1, PM2, PP2	PS1, PS3, PM1, PM2, PP2	PM2, PP2	PS2, PM1, PM2, PP2, PP3	PS2, PM1, PM2, PP2, PP3	PM1, PM2, PP2, PP3	PS1, PS3, PM1, PM2, PP2, PP3	PS1, PS3, PM1, PM2, PP2, PP3	PS1, PS2,PS3, PM1, PM2, PP2, PP3	PS1, PS2, PS3, PM1, PM2, PP2, PP3	PS1, PS2, PS3, PM1, PM2, PP2, PP3	PS1, PS2, PM1, PM2, PP2, PP3	PS1, PS2, PM1, PM2, PP2, PP3	PS1, PS2, PM1, PM2, PP2, PP3	PS1, PS2, PS3, PM1, PM2, PP2, PP3	PS1, PS2, PS3, PM1, PM2, PP2, PP3	PS1, PS2, PS3, PM1, PM2, PP2, PP3	PS1, PS2, PS3, PM1, PM2, PP2, PP3	PS1, PS2, PS3, PM1, PM2, PP2, PP3	PS2, PM1, PM2, PP2	PS2, PM2, PP3	PS2, PM2, PP3	PS2, PM2, PP3	PS2, PM2, PP3
